# Supplementary material for: Effects of Interval Exercise Training on Serum Biochemistry and Bone Mineral Density in Dogs
Source: MDPI journal article supplement (doi:10.3390/ani11092528), 2021-08-28
Supplement: s1 [file s1]

**Supplementary Table S1.** Adaptive training procedure for dogs.

| <b>Goal</b>                                     | <b>Method</b>                                                                                                                                                                                                   |
|-------------------------------------------------|-----------------------------------------------------------------------------------------------------------------------------------------------------------------------------------------------------------------|
| Building rapport with researchers               | 1. Gently petting the neck while looking in the dog's eyes<br>2. Playing tug-a-war and walking outside                                                                                                          |
| Adapting to laboratory environment and training | 1. Practice wearing a Polar H10 and safety belt<br>2. Free roaming around the exercise field<br>3. Playing tug-a-war on the exercise field<br>4. Walking on a treadmill at low speed (<4.0 km/h; within 10 min) |
